# Supplementary material for: A Gene-Based Positive Selection Detection Approach to Identify Vaccine Candidates Using Toxoplasma gondii as a Test Case Protozoan Pathogen
Source: Front Genet. 2018 Aug 20;9:332. doi: 10.3389/fgene.2018.00332 (PMC6109633; doi:10.3389/fgene.2018.00332)
Supplement: Supplementary file 5 [file Table_5.XLSX]

## Sheet: All
ID	Protein Name	Vacceed_score	Ortholog No	No_of_sites	P>95%	P>99%	P>95+99%	Peptides with PSS	Consecutive PSS	Max. consec	Max. peptide	Used PSS	HB peptides	Alleles with PSS	phobius_TM	phobius_SP	signalp_D	targetp_SP	tmhmm_ExpAA	tmhmm_First60	tmhmm_PredHel	wolf_score	wolf_annotation
TGME49_220240	hypothetical protein	0.976	21	42	0	42	42	123	119	3	KETSPTRDI	34	461	93	1	Y	0.47	0.958	41.02	19.76	2	13	Secreted
TGME49_227280	dense granule protein GRA3	0.995	32	20	0	20	20	78	179	8	AAVPWYAVAF	20	602	75	3	N	0.301	0.879	47.22	22.14	2	24	Secreted
TGME49_320190	SAG-related sequence SRS16B	0.897	134	72	6	20	26	55	52	4	QKQSETPCNF	24	450	51	0	Y	0.273	0.188	18.74	16.17	1	13	Secreted
TGME49_215640	zinc finger	0.002	14	143	45	15	60	245	171	5	SPSSGYAPS	57	2154	96	0	N	0.104	0.023	0.17	0	0	0	not_screted_or_membrane
TGME49_261970	hypothetical protein	0.927	68	171	39	14	53	166	272	7	FVLRLTCHPS	47	927	105	0	Y	0.565	0.788	49.09	22.63	1	12.5	Secreted
TGME49_243940	hypothetical protein	0.789	55	14	0	14	14	41	18	4	SSLEGVLEGLK	14	120	35	0	Y	0.782	0.855	0.75	0.74	0	29	Secreted
TGME49_261740	hypothetical protein	0.928	67	13	0	13	13	17	2	4	NSDSGKHER	6	87	23	0	Y	0.347	0.947	19.57	19.57	1	30	Secreted
TGME49_278430	Toxoplasma gondii family A protein	0.824	96	41	5	11	16	19	12	3	TSDAATPDI	13	497	32	1	Y	0.704	0.932	12.78	0.43	0	17	Secreted
TGME49_279540	hypothetical protein	0.571	99	38	7	9	16	21	40	7	AHREKWSLKR	14	223	27	1	N	0.254	0.365	4.86	4.85	0	24	Secreted
TGME49_238530	hypothetical protein	0.988	47	20	4	9	13	16	12	4	EVKSEPESAR	12	181	27	1	N	0.166	0.084	20	0	1	20	Secreted
TGME49_238440	SAG-related sequence SRS22A	0.59	43	28	9	9	18	39	30	4	GSNGSDSEK	16	295	43	0	Y	0.742	0.782	5.61	0.04	0	6.5	membrane_and_secreted
TGME49_221940	adaptin n terminal region domain-containing protein	0.366	24	40	0	9	9	47	1	2	GANQPPQQI	9	2393	60	0	N	0.122	0.035	0.05	0	0	27	membrane
TGME49_214080	toxofilin	0.945	13	39	5	9	14	83	36	3	NHRKEKSLL	14	298	54	0	Y	0.736	0.957	16.77	16.77	1	29	Secreted
TGME49_314487	hypothetical protein	0.981	127	9	0	9	9	39	39	4	RAEDNIFSM	8	290	71	1	N	0.142	0.565	22.1	22.1	1	18.5	membrane
TGME49_269425	hypothetical protein	0.002	80	8	0	8	8	29	24	3	VARNAVSDAY	7	112	30	0	N	0.11	0.046	0	0	0	0	not_screted_or_membrane
TGME49_292250	SAG-related sequence SRS36A	0.01	108	71	18	8	26	53	59	7	HVRRSFWCSR	25	222	46	0	N	0.131	0.017	0	0	0	12	Secreted
TGME49_205250	rhoptry protein ROP18	0.98	6	86	4	7	11	63	35	3	FQTTDITYTF	11	946	77	1	N	0.263	0.739	19.46	19.44	1	8.5	membrane
TGME49_278320	Toxoplasma gondii family A protein	0.76	91	153	25	6	31	31	20	3	ATQEPSGVI	19	399	34	0	Y	0.665	0.863	6.85	0.66	0	19	Secreted
TGME49_224770	SAG-related sequence SRS40D	0.349	27	59	8	6	14	40	20	5	ESSGSSSVEK	14	378	39	0	Y	0.251	0.124	9.92	7.99	0	5	membrane_and_secreted
TGME49_243190	Toxoplasma gondii family A protein	0.918	53	48	3	5	8	19	6	2	SQHGATHHAV	7	506	26	0	Y	0.892	0.938	22.9	14.1	0	27	Secreted
TGME49_309330	SAG-related sequence SRS55F	0.819	122	63	13	5	18	63	107	5	AYGTRAAAT	18	509	86	1	Y	0.54	0.591	9.83	0.4	0	21.5	membrane
TGME49_308090	rhoptry protein ROP5	0.861	121	20	2	5	7	41	29	3	LLFDSCIPV	7	1109	66	0	Y	0.916	0.739	10.81	8.26	0	14	Secreted
TGME49_298960	Toxoplasma gondii family C protein	0.978	112	5	0	5	5	16	1	2	TTVEETDGA	4	313	23	1	N	0.131	0.063	21.87	21.14	1	12.5	Secreted
TGME49_278380	Toxoplasma gondii family A protein	0.796	95	42	14	4	18	30	29	4	FCVRFKASL	12	565	51	0	Y	0.717	0.93	8.95	1.51	0	17.5	Secreted
TGME49_273110	SAG-related sequence SRS30D	0.998	83	28	3	4	7	20	3	3	QAAPPAQSQ	7	669	31	2	N	0.175	0.111	35.19	0.03	1	23	membrane
TGME49_243140	Toxoplasma gondii family A protein	0.939	52	34	1	4	5	10	0	0	NA	2	512	20	1	Y	0.657	0.914	18.19	0.26	1	19.5	Secreted
TGME49_226650	hypothetical protein	0.876	31	58	7	4	11	74	98	3	YIYMRICAW	10	563	90	3	N	0.188	0.326	40.84	30.35	1	0	not_screted_or_membrane
TGME49_221865	hypothetical protein	0.002	23	11	2	4	6	21	32	5	VYVHALTCL	6	205	33	0	N	0.108	0.045	0	0	0	0	not_screted_or_membrane
TGME49_320200	SAG-related sequence SRS16A	0.935	135	39	9	4	13	40	41	3	SARSASVKL	12	448	41	0	Y	0.397	0.375	19.94	17.89	1	15.5	membrane
TGME49_301222	DNA repair protein Rad4 domain-containing protein	0.268	119	99	9	4	13	37	26	5	HCSASSSSL	13	2859	32	2	N	0.099	0.086	0.51	0	0	6.5	membrane
TGME49_275440	dense granule protein GRA6	0.993	86	33	5	3	8	10	2	2	LHPGSVNEF	5	290	13	2	N	0.202	0.854	42.01	22.81	2	22	Secreted
TGME49_207140	SAG-related sequence SRS49B	0.376	8	28	0	3	3	16	0	0	NA	3	460	19	0	N	0.194	0.052	1.97	0.52	0	23	membrane
TGME49_215775	rhoptry protein ROP8	0.859	15	95	10	3	13	97	40	2	YHRDRRTLM	13	1167	85	0	Y	0.572	0.455	23.46	17.89	1	3	membrane_and_secreted
TGME49_320230	SAG-related sequence SRS15C	0.992	136	55	6	3	9	15	3	2	GLAKKVCVR	9	375	26	1	Y	0.553	0.193	21.98	16.59	1	21	membrane
TGME49_310780	dense granule protein GRA4	0.918	125	82	18	3	21	90	153	8	SPMNGGYYMPA	21	629	79	0	Y	0.83	0.956	22.59	14.32	0	28	Secreted
TGME49_309352	SAG-related sequence SRS55N	0.868	123	34	6	3	9	41	4	2	CSPPKTLEV	9	638	38	1	Y	0.281	0.567	29.49	13.06	0	17	Secreted
TGME49_280570	SAG-related sequence SRS35A	0.988	100	23	0	3	3	14	4	2	AALFKGSAP	3	255	23	1	Y	0.655	0.894	41.87	19.24	2	22	Secreted
TGME49_278360	Toxoplasma gondii family A protein	0.997	93	42	4	2	6	15	0	0	NA	5	553	17	1	Y	0.704	0.949	19.42	0.63	1	15.5	Secreted
TGME49_266330	Toxoplasma gondii family A protein	0.85	75	140	5	2	7	24	0	0	NA	6	446	34	1	Y	0.65	0.808	12.16	0.13	0	12.5	Secreted
TGME49_262730	rhoptry protein ROP16	0.698	70	38	1	2	3	20	0	0	NA	3	1185	46	0	Y	0.865	0.909	2.5	2.44	0	11.5	membrane_and_secreted
TGME49_239090	SAG-related sequence SRS23	0.988	49	32	2	2	4	32	0	0	NA	5	421	41	1	Y	0.851	0.972	36.61	15.65	1	30	Secreted
TGME49_301180	SAG-related sequence SRS19F	0.992	118	63	12	2	14	27	28	5	TYPETSDEF	14	403	31	1	N	0.252	0.233	22.11	20.2	1	15.5	membrane_and_secreted
TGME49_290645	hypothetical protein	0.002	106	65	13	2	15	63	53	3	TAFFLTSSN	14	332	69	0	N	0.106	0.088	0.01	0	0	0	not_screted_or_membrane
TGME49_201390	hypothetical protein	0.981	1	32	5	2	7	51	7	3	VSGLTSENGLW	7	236	62	1	Y	0.914	0.974	44.32	21.55	2	28	Secreted
TGME49_279000	SAG-related sequence SRS59J	0.002	97	15	2	1	3	2	4	3	ELKTGPQLR	3	163	4	0	N	0.105	0.06	0.01	0	0	0	not_screted_or_membrane
TGME49_209530	hypothetical protein	1	9	80	9	1	10	44	73	3	SRRALWGSGAL	7	677	61	2	N	0.095	0.01	41.49	0	2	25	membrane
TGME49_278290	Toxoplasma gondii family A protein	0.977	89	17	0	1	1	0	0	0	NA	0	434	0	1	N	0.11	0.045	17.39	0	1	9	membrane
TGME49_274280	hypothetical protein	0.343	85	12	3	1	4	12	31	2	MVAAHTHAI	4	131	41	0	N	0.125	0.092	0	0	0	25	Secreted
TGME49_235140	hypothetical protein	0.86	39	15	2	1	3	11	11	3	RRQPPRAVR	3	602	13	1	N	0.31	0.905	15.3	15.3	0	23	Secreted
TGME49_216370	hypothetical protein	0.002	17	46	4	1	5	15	0	0	NA	4	619	13	0	N	0.109	0.047	0.01	0	0	0	not_screted_or_membrane
TGME49_320240	SAG-related sequence SRS15B	0.857	137	11	0	1	1	6	0	0	NA	1	397	13	0	Y	0.551	0.129	20.68	18.02	1	3.5	membrane_and_secreted
TGME49_278365	Toxoplasma gondii family A protein	0.953	94	67	3	0	3	7	0	0	NA	2	455	6	1	Y	0.724	0.939	18.65	8.53	0	25	Secreted
TGME49_278350	Toxoplasma gondii family A protein	0.913	92	95	2	0	2	6	0	0	NA	2	559	21	1	Y	0.763	0.919	17.41	0.94	0	13.5	Secreted
TGME49_278330	Toxoplasma gondii family A protein	0.816	90	16	4	0	4	6	1	2	ESIPSDEEPK	4	477	7	0	Y	0.738	0.802	3.06	0.78	0	22	Secreted
TGME49_278070	Toxoplasma gondii family A protein	0.001	88	59	0	0	0	0	0	0	NA	0	442	0	0	N	0.177	0.107	0.13	0.11	0	0	not_screted_or_membrane
TGME49_277830	hypothetical protein	0.172	87	16	16	0	16	57	83	4	LFNSRYVAF	16	195	79	0	Y	0.33	0.108	0	0	0	13	Secreted
TGME49_273130	SAG-related sequence SRS30A	0.012	84	40	31	0	31	64	47	4	KAVCPSTTT	24	396	62	1	N	0.181	0.032	3.67	0	0	0	not_screted_or_membrane
TGME49_272300	hypothetical protein	0.06	82	13	10	0	10	68	22	3	WQSKWKGSF	10	339	65	0	N	0.208	0.212	3.62	0.22	0	5	membrane
TGME49_272290	pyruvate dehydrogenase complex subunit PD-HE1Beta	0.814	81	2	0	0	0	0	0	0	NA	0	912	0	0	Y	0.77	0.948	5.3	4.63	0	17.5	Secreted
TGME49_267980	hypothetical protein	0.882	79	29	0	0	0	0	0	0	NA	0	469	0	1	N	0.134	0.341	23.42	23.41	1	2.5	membrane_and_secreted
TGME49_267360	histone deacetylase SIR2-like	0.002	78	67	3	0	3	9	0	0	NA	2	2292	24	0	N	0.113	0.013	0.21	0	0	0	not_screted_or_membrane
TGME49_267340	hypothetical protein	0.001	77	0	0	0	0	0	0	0	NA	0	247	0	0	N	0.175	0.115	0.01	0	0	0	not_screted_or_membrane
TGME49_266390	DNA mismatch repair protein	0.002	76	17	2	0	2	4	0	0	NA	2	1725	12	0	N	0.102	0.018	0.04	0	0	0	not_screted_or_membrane
TGME49_266150	hypothetical protein	0.302	74	36	36	0	36	140	64	6	LQQPVHVSGG	35	898	86	0	Y	0.573	0.542	0.06	0.06	0	0	not_screted_or_membrane
TGME49_263060	Proteasome/cyclosome repeat-containing protein	0.103	72	1	0	0	0	0	0	0	NA	0	2024	0	1	N	0.164	0.156	6.81	0.46	0	5.5	membrane
TGME49_262740	hypothetical protein	0.002	71	23	1	0	1	13	0	0	NA	1	837	17	0	N	0.132	0.087	0	0	0	0	not_screted_or_membrane
TGME49_207010	SAG-related sequence SRS48K	0.835	7	13	3	0	3	15	0	0	NA	3	600	21	0	Y	0.508	0.301	6.56	6.52	0	32	Secreted
TGME49_262470	C protein immunoglobulin-A-binding beta antigen	0.884	69	25	0	0	0	0	0	0	NA	0	489	0	0	Y	0.744	0.92	7.28	7.28	0	32	Secreted
TGME49_258100	TPR repeat region protein	0.001	66	11	2	0	2	12	20	2	RSPSSRSLF	2	412	23	0	N	0.271	0.317	0	0	0	0	not_screted_or_membrane
TGME49_257420	hypothetical protein	0.077	65	33	33	0	33	84	94	3	RPFAGSLAF	26	906	71	0	N	0.349	0.038	0.03	0	0	0	not_screted_or_membrane
TGME49_254510	ankyrin repeat-containing protein	0.002	63	55	2	0	2	10	0	0	NA	2	700	12	0	N	0.106	0.062	0.14	0	0	0	not_screted_or_membrane
TGME49_252440	peptidase c13 family protein	0.761	62	20	15	0	15	65	2	2	SPRLRFFLFSL	7	1014	58	2	Y	0.206	0.163	13.55	0.2	0	23	membrane
TGME49_251660	hypothetical protein	0.84	61	16	16	0	16	44	36	3	GPAATATEA	16	151	48	0	Y	0.636	0.945	8.34	8.34	0	24	Secreted
TGME49_249620	histone deacetylase HDAC2	0.002	60	0	0	0	0	0	0	0	NA	0	954	0	0	N	0.101	0.019	0	0	0	0	not_screted_or_membrane
TGME49_248310	SNF7 family protein	0.002	59	133	1	0	1	3	0	0	NA	1	557	4	0	N	0.107	0.06	0	0	0	0	not_screted_or_membrane
TGME49_245630	hypothetical protein	0.926	58	0	0	0	0	0	0	0	NA	0	263	0	2	N	0.276	0.984	41.63	41.63	2	10	membrane
TGME49_244715	hypothetical protein	0.959	57	8	3	0	3	0	0	0	NA	0	454	0	1	N	0.121	0.024	20.22	0	1	5	membrane
TGME49_244480	peptidase M16 inactive domain-containing protein	0.002	56	14	0	0	0	0	0	0	NA	0	734	0	0	N	0.137	0.126	0.03	0.02	0	0	not_screted_or_membrane
TGME49_243520	hypothetical protein	0.273	54	15	15	0	15	40	41	3	ETAEEASDRK	15	262	32	2	N	0.107	0.04	8.49	0	0	0	not_screted_or_membrane
TGME49_241310	hypothetical protein	0.096	51	27	7	0	7	21	35	3	RGASFPSSL	5	160	55	0	N	0.163	0.207	0.22	0.22	0	16	Secreted
TGME49_239250	diacylglycerol kinase	0.989	50	0	0	0	0	0	0	0	NA	0	2519	0	3	N	0.458	0.263	62.24	22.36	3	19	membrane
TGME49_238860	hypothetical protein	0.002	48	9	1	0	1	5	0	0	NA	1	152	13	0	N	0.143	0.056	0	0	0	0	not_screted_or_membrane
TGME49_238500	SAG-related sequence SRS22F	0.8	46	15	0	0	0	0	0	0	NA	0	261	0	0	Y	0.812	0.874	6.33	0.01	0	27	Secreted
TGME49_238470	SAG-related sequence SRS22C	0.773	45	24	1	0	1	4	0	0	NA	1	273	4	0	Y	0.906	0.925	7.35	0.09	0	17	Secreted
TGME49_238460	SAG-related sequence SRS22B	0.727	44	18	6	0	6	17	5	2	NTVEQPKQR	6	276	19	0	Y	0.808	0.884	2.04	0	0	27	Secreted
TGME49_238040	protein disulfide-isomerase domain-containing protein	0.977	42	33	2	0	2	12	0	0	NA	2	2310	19	1	N	0.108	0.056	20.88	16.1	1	7	membrane
TGME49_235980	ARIADNE family protein	0.002	41	62	1	0	1	6	0	0	NA	1	956	7	0	N	0.102	0.044	0	0	0	0	not_screted_or_membrane
TGME49_235710	hypothetical protein	0.002	40	7	0	0	0	0	0	0	NA	0	275	0	0	N	0.113	0.114	0.37	0.04	0	0	not_screted_or_membrane
TGME49_203300	hypothetical protein	1	4	16	0	0	0	0	0	0	NA	0	2223	0	3	N	0.109	0.072	95.37	0	2	29	membrane
TGME49_234930	SAG-related sequence SRS43	0.019	38	72	0	0	0	0	0	0	NA	0	590	0	0	Y	0.243	0.18	8.54	6.21	0	0	not_screted_or_membrane
TGME49_234280	AMP deaminase	0.002	37	0	0	0	0	0	0	0	NA	0	1946	0	0	N	0.101	0.059	0.15	0	0	0	not_screted_or_membrane
TGME49_230350	hypothetical protein	1	36	0	0	0	0	0	0	0	NA	0	2233	0	8	N	0.142	0.191	136.9	0	4	31	membrane
TGME49_229900	hypothetical protein	0.002	35	161	20	0	20	84	121	6	GRRARRVAA	19	1363	75	0	N	0.146	0.042	0.09	0.01	0	0	not_screted_or_membrane
TGME49_229190	hypothetical protein	0.002	34	11	8	0	8	10	0	0	NA	2	93	15	0	N	0.13	0.046	0	0	0	0	not_screted_or_membrane
TGME49_226080	polyA polymerase	0.002	30	67	4	0	4	18	4	2	SSSLSSSSL	4	1316	31	0	N	0.12	0.08	0.59	0	0	0	not_screted_or_membrane
TGME49_202800	cytochrome c oxidase assembly protein COX11 protein	0.978	3	9	1	0	1	4	0	0	NA	1	1096	3	1	N	0.312	0.075	21.75	0.04	1	5	membrane
TGME49_225970	mediator complex subunit MED31	0.002	29	28	0	0	0	0	0	0	NA	0	344	0	0	N	0.105	0.048	0.05	0	0	0	not_screted_or_membrane
TGME49_224790	SAG-related sequence SRS40A	0.841	28	9	0	0	0	0	0	0	NA	0	428	0	0	Y	0.398	0.243	24.03	19.48	1	3.5	membrane_and_secreted
TGME49_224090	enoyl-CoA hydratase/isomerase family protein	0.009	26	24	1	0	1	2	0	0	NA	1	919	4	0	N	0.162	0.024	9.63	0	0	0	not_screted_or_membrane
TGME49_223660	50S ribosomal protein L4	0.001	25	3	0	0	0	0	0	0	NA	0	1336	0	0	Y	0.195	0.034	0	0	0	0	not_screted_or_membrane
TGME49_221160	acetyltransferase	0.001	22	60	1	0	1	1	0	0	NA	1	554	1	0	Y	0.181	0.188	0.38	0	0	0	not_screted_or_membrane
TGME49_219348	SAG-related sequence SRS55M	0.94	20	37	3	0	3	6	0	0	NA	2	445	9	1	Y	0.667	0.532	19.67	5.94	0	22	Secreted
TGME49_202790	dihydrouridine synthase (dus) protein	0.002	2	3	0	0	0	0	0	0	NA	0	956	0	0	N	0.111	0.062	0.22	0.01	0	0	not_screted_or_membrane
TGME49_217680	hypothetical protein	0.023	19	14	1	0	1	8	0	0	NA	1	3097	18	1	N	0.164	0.267	0.65	0.57	0	7	membrane
TGME49_217050	ADA2-A transcriptional co-activator SAGA component	0.002	18	149	0	0	0	0	0	0	NA	0	1603	0	0	N	0.108	0.046	0.01	0	0	0	not_screted_or_membrane
TGME49_216030	hypothetical protein	0.003	16	9	0	0	0	0	0	0	NA	0	1653	0	0	N	0.238	0.184	0.14	0.01	0	5.5	membrane_and_secreted
TGME49_287280	Toxoplasma gondii family C protein	0.998	143	15	2	0	2	19	0	0	NA	2	403	29	2	N	0.193	0.229	41.45	19.7	2	24	membrane
TGME49_325000	hypothetical protein	0.002	140	5	0	0	0	0	0	0	NA	0	154	0	0	N	0.107	0.065	0	0	0	0	not_screted_or_membrane
TGME49_320250	SAG-related sequence SRS15A	0.873	138	27	0	0	0	0	0	0	NA	0	326	0	0	Y	0.477	0.247	20.71	17.58	1	5.5	membrane_and_secreted
TGME49_320180	SAG-related sequence SRS16C	0.821	133	6	1	0	1	9	0	0	NA	1	431	8	0	Y	0.342	0.223	21.73	17.21	1	4	membrane_and_secreted
TGME49_320170	SAG-related sequence SRS16E	0.887	132	2	0	0	0	0	0	0	NA	0	376	0	0	Y	0.601	0.265	19.78	8.26	0	27	Secreted
TGME49_319670	hypothetical protein	0.002	131	4	0	0	0	0	0	0	NA	0	333	0	0	N	0.107	0.058	0	0	0	0	not_screted_or_membrane
TGME49_319620	hypothetical protein	0.992	130	73	3	0	3	12	0	0	NA	3	1440	14	4	N	0.262	0.988	68.24	29.6	3	28	membrane
TGME49_315740	SAG-related sequence SRS54	0.887	129	41	2	0	2	3	0	0	NA	2	533	3	1	N	0.122	0.152	22.38	19.85	0	21	Secreted
TGME49_315380	SAG-related sequence SRS53B	0.945	128	56	10	0	10	43	13	3	NTSKDSSVTPR	10	492	46	0	Y	0.856	0.873	25.11	19.73	1	17.5	Secreted
TGME49_310330	hypothetical protein	0.002	124	31	1	0	1	4	0	0	NA	1	630	4	0	N	0.11	0.113	0	0	0	0	not_screted_or_membrane
TGME49_307000	hypothetical protein	0.002	120	39	0	0	0	0	0	0	NA	0	290	0	0	N	0.108	0.154	0	0	0	0	not_screted_or_membrane
TGME49_213240	hypothetical protein	0.996	12	54	54	0	54	270	242	4	RSDEVQQAG	53	1540	107	1	N	0.161	0.047	27.78	2.22	1	30	membrane
TGME49_301170	SAG-related sequence SRS19D	0.837	117	52	0	0	0	0	0	0	NA	0	435	0	0	Y	0.388	0.143	25.41	9.01	1	4	membrane_and_secreted
TGME49_301150	SAG-related sequence SRS19B	0.652	116	21	0	0	0	0	0	0	NA	0	414	0	0	Y	0.346	0.193	16.14	14.08	0	11.5	Secreted
TGME49_237700	ADP/ATP carrier protein	0.235	115	1	0	0	0	0	0	0	NA	0	100	0	0	N	0.111	0.069	5.54	5.54	0	9.5	membrane
TGME49_299980	hypothetical protein	0.014	114	8	0	0	0	0	0	0	NA	0	619	0	0	N	0.197	0.082	7.31	7.2	0	0	not_screted_or_membrane
TGME49_297270	hypothetical protein	0.845	110	4	0	0	0	0	0	0	NA	0	856	0	0	Y	0.847	0.932	3.4	3.35	0	23	Secreted
TGME49_212130	phospholipase	1	11	0	0	0	0	0	0	0	NA	0	1971	0	4	N	0.108	0.063	61.45	0	2	28	membrane
TGME49_292290	hypothetical protein	0.697	109	12	12	0	12	95	97	3	RPSFLSYVTA	12	537	88	3	N	0.214	0.293	38.38	16.29	0	4.5	membrane_and_secreted
TGME49_290700	hypothetical protein	0.793	107	42	5	0	5	13	0	0	NA	3	450	21	0	Y	0.868	0.936	14.06	0.43	0	15	Secreted
TGME49_290270	SPRY domain-containing protein	0.002	105	2	0	0	0	0	0	0	NA	0	884	0	0	N	0.111	0.039	0	0	0	0	not_screted_or_membrane
TGME49_285825	hypothetical protein	0.002	104	9	1	0	1	7	0	0	NA	1	91	10	0	N	0.101	0.098	0	0	0	0	not_screted_or_membrane
TGME49_282140	cwf21 protein	0.002	103	59	4	0	4	18	0	0	NA	3	457	23	0	N	0.099	0.02	0	0	0	0	not_screted_or_membrane
TGME49_210330	SAG-related sequence SRS37B	0.948	10	57	1	0	1	1	0	0	NA	1	484	1	0	Y	0.808	0.939	22.57	19.51	1	17.5	Secreted

## Sheet: Candidates
ID	Protein Name	Vacceed_score	Ortholog No	No_of_sites	P>95%	P>99%	P>95+99%	Peptides with PSS	Consecutive PSS	Max. consec	Max. peptide	Used PSS	HB peptides	Alleles with PSS	phobius_TM	phobius_SP	signalp_D	targetp_SP	tmhmm_ExpAA	tmhmm_First60	tmhmm_PredHel	wolf_score	wolf_annotation
TGME49_261970	hypothetical protein	0.927	68	171	39	14	53	166	272	7	FVLRLTCHPS	47	927	105	0	Y	0.565	0.788	49.09	22.63	1	12.5	Secreted
TGME49_213240	hypothetical protein	0.996	12	54	54	0	54	270	242	4	RSDEVQQAG	53	1540	107	1	N	0.161	0.047	27.78	2.22	1	30	membrane
TGME49_227280	dense granule protein GRA3	0.995	32	20	0	20	20	78	179	8	AAVPWYAVAF	20	602	75	3	N	0.301	0.879	47.22	22.14	2	24	Secreted
TGME49_310780	dense granule protein GRA4	0.918	125	82	18	3	21	90	153	8	SPMNGGYYMPA	21	629	79	0	Y	0.83	0.956	22.59	14.32	0	28	Secreted
TGME49_220240	hypothetical protein	0.976	21	42	0	42	42	123	119	3	KETSPTRDI	34	461	93	1	Y	0.47	0.958	41.02	19.76	2	13	Secreted
TGME49_309330	SAG-related sequence SRS55F	0.819	122	63	13	5	18	63	107	5	AYGTRAAAT	18	509	86	1	Y	0.54	0.591	9.83	0.4	0	21.5	membrane
TGME49_226650	hypothetical protein	0.876	31	58	7	4	11	74	98	3	YIYMRICAW	10	563	90	3	N	0.188	0.326	40.84	30.35	1	0	not_screted_or_membrane
TGME49_292290	hypothetical protein	0.697	109	12	12	0	12	95	97	3	RPSFLSYVTA	12	537	88	3	N	0.214	0.293	38.38	16.29	0	4.5	membrane_and_secreted
TGME49_209530	hypothetical protein	1	9	80	9	1	10	44	73	3	SRRALWGSGAL	7	677	61	2	N	0.095	0.01	41.49	0	2	25	membrane
TGME49_320190	SAG-related sequence SRS16B	0.897	134	72	6	20	26	55	52	4	QKQSETPCNF	24	450	51	0	Y	0.273	0.188	18.74	16.17	1	13	Secreted
TGME49_320200	SAG-related sequence SRS16A	0.935	135	39	9	4	13	40	41	3	SARSASVKL	12	448	41	0	Y	0.397	0.375	19.94	17.89	1	15.5	membrane
TGME49_279540	hypothetical protein	0.571	99	38	7	9	16	21	40	7	AHREKWSLKR	14	223	27	1	N	0.254	0.365	4.86	4.85	0	24	Secreted
TGME49_215775	rhoptry protein ROP8	0.859	15	95	10	3	13	97	40	2	YHRDRRTLM	13	1167	85	0	Y	0.572	0.455	23.46	17.89	1	3	membrane_and_secreted
TGME49_314487	hypothetical protein	0.981	127	9	0	9	9	39	39	4	RAEDNIFSM	8	290	71	1	N	0.142	0.565	22.1	22.1	1	18.5	membrane
TGME49_251660	hypothetical protein	0.84	61	16	16	0	16	44	36	3	GPAATATEA	16	151	48	0	Y	0.636	0.945	8.34	8.34	0	24	Secreted
TGME49_214080	toxofilin	0.945	13	39	5	9	14	83	36	3	NHRKEKSLL	14	298	54	0	Y	0.736	0.957	16.77	16.77	1	29	Secreted
TGME49_205250	rhoptry protein ROP18	0.98	6	86	4	7	11	63	35	3	FQTTDITYTF	11	946	77	1	N	0.263	0.739	19.46	19.44	1	8.5	membrane
TGME49_238440	SAG-related sequence SRS22A	0.59	43	28	9	9	18	39	30	4	GSNGSDSEK	16	295	43	0	Y	0.742	0.782	5.61	0.04	0	6.5	membrane_and_secreted
TGME49_308090	rhoptry protein ROP5	0.861	121	20	2	5	7	41	29	3	LLFDSCIPV	7	1109	66	0	Y	0.916	0.739	10.81	8.26	0	14	Secreted
TGME49_278380	Toxoplasma gondii family A protein	0.796	95	42	14	4	18	30	29	4	FCVRFKASL	12	565	51	0	Y	0.717	0.93	8.95	1.51	0	17.5	Secreted
TGME49_301180	SAG-related sequence SRS19F	0.992	118	63	12	2	14	27	28	5	TYPETSDEF	14	403	31	1	N	0.252	0.233	22.11	20.2	1	15.5	membrane_and_secreted
TGME49_278320	Toxoplasma gondii family A protein	0.76	91	153	25	6	31	31	20	3	ATQEPSGVI	19	399	34	0	Y	0.665	0.863	6.85	0.66	0	19	Secreted
TGME49_243940	hypothetical protein	0.789	55	14	0	14	14	41	18	4	SSLEGVLEGLK	14	120	35	0	Y	0.782	0.855	0.75	0.74	0	29	Secreted
TGME49_315380	SAG-related sequence SRS53B	0.945	128	56	10	0	10	43	13	3	NTSKDSSVTPR	10	492	46	0	Y	0.856	0.873	25.11	19.73	1	17.5	Secreted
TGME49_238530	hypothetical protein	0.988	47	20	4	9	13	16	12	4	EVKSEPESAR	12	181	27	1	N	0.166	0.084	20	0	1	20	Secreted
TGME49_278430	Toxoplasma gondii family A protein	0.824	96	41	5	11	16	19	12	3	TSDAATPDI	13	497	32	1	Y	0.704	0.932	12.78	0.43	0	17	Secreted
TGME49_235140	hypothetical protein	0.86	39	15	2	1	3	11	11	3	RRQPPRAVR	3	602	13	1	N	0.31	0.905	15.3	15.3	0	23	Secreted
TGME49_201390	hypothetical protein	0.981	1	32	5	2	7	51	7	3	VSGLTSENGLW	7	236	62	1	Y	0.914	0.974	44.32	21.55	2	28	Secreted
TGME49_243190	Toxoplasma gondii family A protein	0.918	53	48	3	5	8	19	6	2	SQHGATHHAV	7	506	26	0	Y	0.892	0.938	22.9	14.1	0	27	Secreted
TGME49_238460	SAG-related sequence SRS22B	0.727	44	18	6	0	6	17	5	2	NTVEQPKQR	6	276	19	0	Y	0.808	0.884	2.04	0	0	27	Secreted
TGME49_280570	SAG-related sequence SRS35A	0.988	100	23	0	3	3	14	4	2	AALFKGSAP	3	255	23	1	Y	0.655	0.894	41.87	19.24	2	22	Secreted
TGME49_309352	SAG-related sequence SRS55N	0.868	123	34	6	3	9	41	4	2	CSPPKTLEV	9	638	38	1	Y	0.281	0.567	29.49	13.06	0	17	Secreted
TGME49_320230	SAG-related sequence SRS15C	0.992	136	55	6	3	9	15	3	2	GLAKKVCVR	9	375	26	1	Y	0.553	0.193	21.98	16.59	1	21	membrane
TGME49_273110	SAG-related sequence SRS30D	0.998	83	28	3	4	7	20	3	3	QAAPPAQSQ	7	669	31	2	N	0.175	0.111	35.19	0.03	1	23	membrane
TGME49_275440	dense granule protein GRA6	0.993	86	33	5	3	8	10	2	2	LHPGSVNEF	5	290	13	2	N	0.202	0.854	42.01	22.81	2	22	Secreted
TGME49_261740	hypothetical protein	0.928	67	13	0	13	13	17	2	4	NSDSGKHER	6	87	23	0	Y	0.347	0.947	19.57	19.57	1	30	Secreted
TGME49_252440	peptidase c13 family protein	0.761	62	20	15	0	15	65	2	2	SPRLRFFLFSL	7	1014	58	2	Y	0.206	0.163	13.55	0.2	0	23	membrane
TGME49_278330	Toxoplasma gondii family A protein	0.816	90	16	4	0	4	6	1	2	ESIPSDEEPK	4	477	7	0	Y	0.738	0.802	3.06	0.78	0	22	Secreted
TGME49_298960	Toxoplasma gondii family C protein	0.978	112	5	0	5	5	16	1	2	TTVEETDGA	4	313	23	1	N	0.131	0.063	21.87	21.14	1	12.5	Secreted
TGME49_202800	cytochrome c oxidase assembly protein COX11 protein	0.978	3	9	1	0	1	4	0	0	NA	1	1096	3	1	N	0.312	0.075	21.75	0.04	1	5	membrane
TGME49_319620	hypothetical protein	0.992	130	73	3	0	3	12	0	0	NA	3	1440	14	4	N	0.262	0.988	68.24	29.6	3	28	membrane
TGME49_244715	hypothetical protein	0.959	57	8	3	0	3	0	0	0	NA	0	454	0	1	N	0.121	0.024	20.22	0	1	5	membrane
TGME49_290700	hypothetical protein	0.793	107	42	5	0	5	13	0	0	NA	3	450	21	0	Y	0.868	0.936	14.06	0.43	0	15	Secreted
TGME49_238040	protein disulfide-isomerase domain-containing protein	0.977	42	33	2	0	2	12	0	0	NA	2	2310	19	1	N	0.108	0.056	20.88	16.1	1	7	membrane
TGME49_262730	rhoptry protein ROP16	0.698	70	38	1	2	3	20	0	0	NA	3	1185	46	0	Y	0.865	0.909	2.5	2.44	0	11.5	membrane_and_secreted
TGME49_320240	SAG-related sequence SRS15B	0.857	137	11	0	1	1	6	0	0	NA	1	397	13	0	Y	0.551	0.129	20.68	18.02	1	3.5	membrane_and_secreted
TGME49_320180	SAG-related sequence SRS16C	0.821	133	6	1	0	1	9	0	0	NA	1	431	8	0	Y	0.342	0.223	21.73	17.21	1	4	membrane_and_secreted
TGME49_238470	SAG-related sequence SRS22C	0.773	45	24	1	0	1	4	0	0	NA	1	273	4	0	Y	0.906	0.925	7.35	0.09	0	17	Secreted
TGME49_239090	SAG-related sequence SRS23	0.988	49	32	2	2	4	32	0	0	NA	5	421	41	1	Y	0.851	0.972	36.61	15.65	1	30	Secreted
TGME49_210330	SAG-related sequence SRS37B	0.948	10	57	1	0	1	1	0	0	NA	1	484	1	0	Y	0.808	0.939	22.57	19.51	1	17.5	Secreted
TGME49_207010	SAG-related sequence SRS48K	0.835	7	13	3	0	3	15	0	0	NA	3	600	21	0	Y	0.508	0.301	6.56	6.52	0	32	Secreted
TGME49_315740	SAG-related sequence SRS54	0.887	129	41	2	0	2	3	0	0	NA	2	533	3	1	N	0.122	0.152	22.38	19.85	0	21	Secreted
TGME49_219348	SAG-related sequence SRS55M	0.94	20	37	3	0	3	6	0	0	NA	2	445	9	1	Y	0.667	0.532	19.67	5.94	0	22	Secreted
TGME49_278360	Toxoplasma gondii family A protein	0.997	93	42	4	2	6	15	0	0	NA	5	553	17	1	Y	0.704	0.949	19.42	0.63	1	15.5	Secreted
TGME49_278290	Toxoplasma gondii family A protein	0.977	89	17	0	1	1	0	0	0	NA	0	434	0	1	N	0.11	0.045	17.39	0	1	9	membrane
TGME49_278365	Toxoplasma gondii family A protein	0.953	94	67	3	0	3	7	0	0	NA	2	455	6	1	Y	0.724	0.939	18.65	8.53	0	25	Secreted
TGME49_243140	Toxoplasma gondii family A protein	0.939	52	34	1	4	5	10	0	0	NA	2	512	20	1	Y	0.657	0.914	18.19	0.26	1	19.5	Secreted
TGME49_278350	Toxoplasma gondii family A protein	0.913	92	95	2	0	2	6	0	0	NA	2	559	21	1	Y	0.763	0.919	17.41	0.94	0	13.5	Secreted
TGME49_266330	Toxoplasma gondii family A protein	0.85	75	140	5	2	7	24	0	0	NA	6	446	34	1	Y	0.65	0.808	12.16	0.13	0	12.5	Secreted
TGME49_287280	Toxoplasma gondii family C protein	0.998	143	15	2	0	2	19	0	0	NA	2	403	29	2	N	0.193	0.229	41.45	19.7	2	24	membrane

## Sheet: Candidates (No hypo)
ID	Protein Name	Rank	Vacceed_score	Ortholog No	No_of_sites	P>95%	P>99%	P>95+99%	Peptides with PSS	Consecutive PSS	Max. consec	Max. peptide	Used PSS	HB peptides	Alleles with PSS	phobius_TM	phobius_SP	signalp_D	targetp_SP	tmhmm_ExpAA	tmhmm_First60	tmhmm_PredHel	wolf_score	wolf_annotation
TGME49_227280	dense granule protein GRA3	1	0.995	32	20	0	20	20	78	179	8	AAVPWYAVAF	20	602	75	3	N	0.301	0.879	47.22	22.14	2	24	Secreted
TGME49_310780	dense granule protein GRA4	2	0.918	125	82	18	3	21	90	153	8	SPMNGGYYMPA	21	629	79	0	Y	0.83	0.956	22.59	14.32	0	28	Secreted
TGME49_309330	SAG-related sequence SRS55F	3	0.819	122	63	13	5	18	63	107	5	AYGTRAAAT	18	509	86	1	Y	0.54	0.591	9.83	0.4	0	21.5	membrane
TGME49_320190	SAG-related sequence SRS16B	4	0.897	134	72	6	20	26	55	52	4	QKQSETPCNF	24	450	51	0	Y	0.273	0.188	18.74	16.17	1	13	Secreted
TGME49_320200	SAG-related sequence SRS16A	5	0.935	135	39	9	4	13	40	41	3	SARSASVKL	12	448	41	0	Y	0.397	0.375	19.94	17.89	1	15.5	membrane
TGME49_215775	rhoptry protein ROP8	6	0.859	15	95	10	3	13	97	40	2	YHRDRRTLM	13	1167	85	0	Y	0.572	0.455	23.46	17.89	1	3	membrane_and_secreted
TGME49_214080	toxofilin	7	0.945	13	39	5	9	14	83	36	3	NHRKEKSLL	14	298	54	0	Y	0.736	0.957	16.77	16.77	1	29	Secreted
TGME49_205250	rhoptry protein ROP18	8	0.98	6	86	4	7	11	63	35	3	FQTTDITYTF	11	946	77	1	N	0.263	0.739	19.46	19.44	1	8.5	membrane
TGME49_238440	SAG-related sequence SRS22A	9	0.59	43	28	9	9	18	39	30	4	GSNGSDSEK	16	295	43	0	Y	0.742	0.782	5.61	0.04	0	6.5	membrane_and_secreted
TGME49_308090	rhoptry protein ROP5	10	0.861	121	20	2	5	7	41	29	3	LLFDSCIPV	7	1109	66	0	Y	0.916	0.739	10.81	8.26	0	14	Secreted
TGME49_278380	Toxoplasma gondii family A protein	11	0.796	95	42	14	4	18	30	29	4	FCVRFKASL	12	565	51	0	Y	0.717	0.93	8.95	1.51	0	17.5	Secreted
TGME49_301180	SAG-related sequence SRS19F	12	0.992	118	63	12	2	14	27	28	5	TYPETSDEF	14	403	31	1	N	0.252	0.233	22.11	20.2	1	15.5	membrane_and_secreted
TGME49_278320	Toxoplasma gondii family A protein	13	0.76	91	153	25	6	31	31	20	3	ATQEPSGVI	19	399	34	0	Y	0.665	0.863	6.85	0.66	0	19	Secreted
TGME49_315380	SAG-related sequence SRS53B	14	0.945	128	56	10	0	10	43	13	3	NTSKDSSVTPR	10	492	46	0	Y	0.856	0.873	25.11	19.73	1	17.5	Secreted
TGME49_278430	Toxoplasma gondii family A protein	15	0.824	96	41	5	11	16	19	12	3	TSDAATPDI	13	497	32	1	Y	0.704	0.932	12.78	0.43	0	17	Secreted
TGME49_243190	Toxoplasma gondii family A protein	16	0.918	53	48	3	5	8	19	6	2	SQHGATHHAV	7	506	26	0	Y	0.892	0.938	22.9	14.1	0	27	Secreted
TGME49_238460	SAG-related sequence SRS22B	17	0.727	44	18	6	0	6	17	5	2	NTVEQPKQR	6	276	19	0	Y	0.808	0.884	2.04	0	0	27	Secreted
TGME49_280570	SAG-related sequence SRS35A	18	0.988	100	23	0	3	3	14	4	2	AALFKGSAP	3	255	23	1	Y	0.655	0.894	41.87	19.24	2	22	Secreted
TGME49_309352	SAG-related sequence SRS55N	19	0.868	123	34	6	3	9	41	4	2	CSPPKTLEV	9	638	38	1	Y	0.281	0.567	29.49	13.06	0	17	Secreted
TGME49_320230	SAG-related sequence SRS15C	20	0.992	136	55	6	3	9	15	3	2	GLAKKVCVR	9	375	26	1	Y	0.553	0.193	21.98	16.59	1	21	membrane
TGME49_273110	SAG-related sequence SRS30D	21	0.998	83	28	3	4	7	20	3	3	QAAPPAQSQ	7	669	31	2	N	0.175	0.111	35.19	0.03	1	23	membrane
TGME49_275440	dense granule protein GRA6	22	0.993	86	33	5	3	8	10	2	2	LHPGSVNEF	5	290	13	2	N	0.202	0.854	42.01	22.81	2	22	Secreted
TGME49_252440	peptidase c13 family protein	23	0.761	62	20	15	0	15	65	2	2	SPRLRFFLFSL	7	1014	58	2	Y	0.206	0.163	13.55	0.2	0	23	membrane
TGME49_278330	Toxoplasma gondii family A protein	24	0.816	90	16	4	0	4	6	1	2	ESIPSDEEPK	4	477	7	0	Y	0.738	0.802	3.06	0.78	0	22	Secreted
TGME49_298960	Toxoplasma gondii family C protein	25	0.978	112	5	0	5	5	16	1	2	TTVEETDGA	4	313	23	1	N	0.131	0.063	21.87	21.14	1	12.5	Secreted
TGME49_202800	cytochrome c oxidase assembly protein COX11 protein	26	0.978	3	9	1	0	1	4	0	0	NA	1	1096	3	1	N	0.312	0.075	21.75	0.04	1	5	membrane
TGME49_238040	protein disulfide-isomerase domain-containing protein	27	0.977	42	33	2	0	2	12	0	0	NA	2	2310	19	1	N	0.108	0.056	20.88	16.1	1	7	membrane
TGME49_262730	rhoptry protein ROP16	28	0.698	70	38	1	2	3	20	0	0	NA	3	1185	46	0	Y	0.865	0.909	2.5	2.44	0	11.5	membrane_and_secreted
TGME49_320240	SAG-related sequence SRS15B	29	0.857	137	11	0	1	1	6	0	0	NA	1	397	13	0	Y	0.551	0.129	20.68	18.02	1	3.5	membrane_and_secreted
TGME49_320180	SAG-related sequence SRS16C	30	0.821	133	6	1	0	1	9	0	0	NA	1	431	8	0	Y	0.342	0.223	21.73	17.21	1	4	membrane_and_secreted
TGME49_238470	SAG-related sequence SRS22C	31	0.773	45	24	1	0	1	4	0	0	NA	1	273	4	0	Y	0.906	0.925	7.35	0.09	0	17	Secreted
TGME49_239090	SAG-related sequence SRS23	32	0.988	49	32	2	2	4	32	0	0	NA	5	421	41	1	Y	0.851	0.972	36.61	15.65	1	30	Secreted
TGME49_210330	SAG-related sequence SRS37B	33	0.948	10	57	1	0	1	1	0	0	NA	1	484	1	0	Y	0.808	0.939	22.57	19.51	1	17.5	Secreted
TGME49_207010	SAG-related sequence SRS48K	34	0.835	7	13	3	0	3	15	0	0	NA	3	600	21	0	Y	0.508	0.301	6.56	6.52	0	32	Secreted
TGME49_315740	SAG-related sequence SRS54	35	0.887	129	41	2	0	2	3	0	0	NA	2	533	3	1	N	0.122	0.152	22.38	19.85	0	21	Secreted
TGME49_219348	SAG-related sequence SRS55M	36	0.94	20	37	3	0	3	6	0	0	NA	2	445	9	1	Y	0.667	0.532	19.67	5.94	0	22	Secreted
TGME49_278360	Toxoplasma gondii family A protein	37	0.997	93	42	4	2	6	15	0	0	NA	5	553	17	1	Y	0.704	0.949	19.42	0.63	1	15.5	Secreted
TGME49_278290	Toxoplasma gondii family A protein	38	0.977	89	17	0	1	1	0	0	0	NA	0	434	0	1	N	0.11	0.045	17.39	0	1	9	membrane
TGME49_278365	Toxoplasma gondii family A protein	39	0.953	94	67	3	0	3	7	0	0	NA	2	455	6	1	Y	0.724	0.939	18.65	8.53	0	25	Secreted
TGME49_243140	Toxoplasma gondii family A protein	40	0.939	52	34	1	4	5	10	0	0	NA	2	512	20	1	Y	0.657	0.914	18.19	0.26	1	19.5	Secreted
TGME49_278350	Toxoplasma gondii family A protein	41	0.913	92	95	2	0	2	6	0	0	NA	2	559	21	1	Y	0.763	0.919	17.41	0.94	0	13.5	Secreted
TGME49_266330	Toxoplasma gondii family A protein	42	0.85	75	140	5	2	7	24	0	0	NA	6	446	34	1	Y	0.65	0.808	12.16	0.13	0	12.5	Secreted
TGME49_287280	Toxoplasma gondii family C protein	43	0.998	143	15	2	0	2	19	0	0	NA	2	403	29	2	N	0.193	0.229	41.45	19.7	2	24	membrane

## Sheet: Not_exposed_and_PS
ID	Protein Name	Vacceed_score	Ortholog No	No_of_sites	P>95%	P>99%	P>95+99%	Peptides with PSS	Consecutive PSS	Max. consec	Max. peptide	Used PSS	HB peptides	Alleles with PSS	phobius_TM	phobius_SP	signalp_D	targetp_SP	tmhmm_ExpAA	tmhmm_First60	tmhmm_PredHel	wolf_score	wolf_annotation
TGME49_258100	TPR repeat region protein	0.001	66	11	2	0	2	12	20	2	RSPSSRSLF	2	412	23	0	N	0.271	0.317	0	0	0	0	not_screted_or_membrane
TGME49_221160	acetyltransferase	0.001	22	60	1	0	1	1	0	0	NA	1	554	1	0	Y	0.181	0.188	0.38	0	0	0	not_screted_or_membrane
TGME49_215640	zinc finger	0.002	14	143	45	15	60	245	171	5	SPSSGYAPS	57	2154	96	0	N	0.104	0.023	0.17	0	0	0	not_screted_or_membrane
TGME49_229900	hypothetical protein	0.002	35	161	20	0	20	84	121	6	GRRARRVAA	19	1363	75	0	N	0.146	0.042	0.09	0.01	0	0	not_screted_or_membrane
TGME49_290645	hypothetical protein	0.002	106	65	13	2	15	63	53	3	TAFFLTSSN	14	332	69	0	N	0.106	0.088	0.01	0	0	0	not_screted_or_membrane
TGME49_269425	hypothetical protein	0.002	80	8	0	8	8	29	24	3	VARNAVSDAY	7	112	30	0	N	0.11	0.046	0	0	0	0	not_screted_or_membrane
TGME49_229190	hypothetical protein	0.002	34	11	8	0	8	10	0	0	NA	2	93	15	0	N	0.13	0.046	0	0	0	0	not_screted_or_membrane
TGME49_221865	hypothetical protein	0.002	23	11	2	4	6	21	32	5	VYVHALTCL	6	205	33	0	N	0.108	0.045	0	0	0	0	not_screted_or_membrane
TGME49_216370	hypothetical protein	0.002	17	46	4	1	5	15	0	0	NA	4	619	13	0	N	0.109	0.047	0.01	0	0	0	not_screted_or_membrane
TGME49_226080	polyA polymerase	0.002	30	67	4	0	4	18	4	2	SSSLSSSSL	4	1316	31	0	N	0.12	0.08	0.59	0	0	0	not_screted_or_membrane
TGME49_282140	cwf21 protein	0.002	103	59	4	0	4	18	0	0	NA	3	457	23	0	N	0.099	0.02	0	0	0	0	not_screted_or_membrane
TGME49_279000	SAG-related sequence SRS59J	0.002	97	15	2	1	3	2	4	3	ELKTGPQLR	3	163	4	0	N	0.105	0.06	0.01	0	0	0	not_screted_or_membrane
TGME49_267360	histone deacetylase SIR2-like	0.002	78	67	3	0	3	9	0	0	NA	2	2292	24	0	N	0.113	0.013	0.21	0	0	0	not_screted_or_membrane
TGME49_266390	DNA mismatch repair protein	0.002	76	17	2	0	2	4	0	0	NA	2	1725	12	0	N	0.102	0.018	0.04	0	0	0	not_screted_or_membrane
TGME49_254510	ankyrin repeat-containing protein	0.002	63	55	2	0	2	10	0	0	NA	2	700	12	0	N	0.106	0.062	0.14	0	0	0	not_screted_or_membrane
TGME49_262740	hypothetical protein	0.002	71	23	1	0	1	13	0	0	NA	1	837	17	0	N	0.132	0.087	0	0	0	0	not_screted_or_membrane
TGME49_248310	SNF7 family protein	0.002	59	133	1	0	1	3	0	0	NA	1	557	4	0	N	0.107	0.06	0	0	0	0	not_screted_or_membrane
TGME49_238860	hypothetical protein	0.002	48	9	1	0	1	5	0	0	NA	1	152	13	0	N	0.143	0.056	0	0	0	0	not_screted_or_membrane
TGME49_235980	ARIADNE family protein	0.002	41	62	1	0	1	6	0	0	NA	1	956	7	0	N	0.102	0.044	0	0	0	0	not_screted_or_membrane
TGME49_310330	hypothetical protein	0.002	124	31	1	0	1	4	0	0	NA	1	630	4	0	N	0.11	0.113	0	0	0	0	not_screted_or_membrane
TGME49_285825	hypothetical protein	0.002	104	9	1	0	1	7	0	0	NA	1	91	10	0	N	0.101	0.098	0	0	0	0	not_screted_or_membrane
TGME49_224090	enoyl-CoA hydratase/isomerase family protein	0.009	26	24	1	0	1	2	0	0	NA	1	919	4	0	N	0.162	0.024	9.63	0	0	0	not_screted_or_membrane
TGME49_292250	SAG-related sequence SRS36A	0.01	108	71	18	8	26	53	59	7	HVRRSFWCSR	25	222	46	0	N	0.131	0.017	0	0	0	12	Secreted
TGME49_273130	SAG-related sequence SRS30A	0.012	84	40	31	0	31	64	47	4	KAVCPSTTT	24	396	62	1	N	0.181	0.032	3.67	0	0	0	not_screted_or_membrane
TGME49_217680	hypothetical protein	0.023	19	14	1	0	1	8	0	0	NA	1	3097	18	1	N	0.164	0.267	0.65	0.57	0	7	membrane
TGME49_272300	hypothetical protein	0.06	82	13	10	0	10	68	22	3	WQSKWKGSF	10	339	65	0	N	0.208	0.212	3.62	0.22	0	5	membrane
TGME49_257420	hypothetical protein	0.077	65	33	33	0	33	84	94	3	RPFAGSLAF	26	906	71	0	N	0.349	0.038	0.03	0	0	0	not_screted_or_membrane
TGME49_241310	hypothetical protein	0.096	51	27	7	0	7	21	35	3	RGASFPSSL	5	160	55	0	N	0.163	0.207	0.22	0.22	0	16	Secreted
TGME49_277830	hypothetical protein	0.172	87	16	16	0	16	57	83	4	LFNSRYVAF	16	195	79	0	Y	0.33	0.108	0	0	0	13	Secreted
TGME49_301222	DNA repair protein Rad4 domain-containing protein	0.268	119	99	9	4	13	37	26	5	HCSASSSSL	13	2859	32	2	N	0.099	0.086	0.51	0	0	6.5	membrane
TGME49_243520	hypothetical protein	0.273	54	15	15	0	15	40	41	3	ETAEEASDRK	15	262	32	2	N	0.107	0.04	8.49	0	0	0	not_screted_or_membrane
TGME49_266150	hypothetical protein	0.302	74	36	36	0	36	140	64	6	LQQPVHVSGG	35	898	86	0	Y	0.573	0.542	0.06	0.06	0	0	not_screted_or_membrane
TGME49_274280	hypothetical protein	0.343	85	12	3	1	4	12	31	2	MVAAHTHAI	4	131	41	0	N	0.125	0.092	0	0	0	25	Secreted
TGME49_224770	SAG-related sequence SRS40D	0.349	27	59	8	6	14	40	20	5	ESSGSSSVEK	14	378	39	0	Y	0.251	0.124	9.92	7.99	0	5	membrane_and_secreted
TGME49_221940	adaptin n terminal region domain-containing protein	0.366	24	40	0	9	9	47	1	2	GANQPPQQI	9	2393	60	0	N	0.122	0.035	0.05	0	0	27	membrane
TGME49_207140	SAG-related sequence SRS49B	0.376	8	28	0	3	3	16	0	0	NA	3	460	19	0	N	0.194	0.052	1.97	0.52	0	23	membrane

## Sheet: Not_exposed_and_PS (No hypo)
ID	Protein Name	Vacceed_score	Ortholog No	No_of_sites	P>95%	P>99%	P>95+99%	Peptides with PSS	Consecutive PSS	Max. consec	Max. peptide	Used PSS	HB peptides	Alleles with PSS	phobius_TM	phobius_SP	signalp_D	targetp_SP	tmhmm_ExpAA	tmhmm_First60	tmhmm_PredHel	wolf_score	wolf_annotation
TGME49_221160	acetyltransferase	0.001	22	60	1	0	1	1	0	0	NA	1	554	1	0	Y	0.181	0.188	0.38	0	0	0	not_screted_or_membrane
TGME49_221940	adaptin n terminal region domain-containing protein	0.366	24	40	0	9	9	47	1	2	GANQPPQQI	9	2393	60	0	N	0.122	0.035	0.05	0	0	27	membrane
TGME49_254510	ankyrin repeat-containing protein	0.002	63	55	2	0	2	10	0	0	NA	2	700	12	0	N	0.106	0.062	0.14	0	0	0	not_screted_or_membrane
TGME49_235980	ARIADNE family protein	0.002	41	62	1	0	1	6	0	0	NA	1	956	7	0	N	0.102	0.044	0	0	0	0	not_screted_or_membrane
TGME49_282140	cwf21 protein	0.002	103	59	4	0	4	18	0	0	NA	3	457	23	0	N	0.099	0.02	0	0	0	0	not_screted_or_membrane
TGME49_266390	DNA mismatch repair protein	0.002	76	17	2	0	2	4	0	0	NA	2	1725	12	0	N	0.102	0.018	0.04	0	0	0	not_screted_or_membrane
TGME49_301222	DNA repair protein Rad4 domain-containing protein	0.268	119	99	9	4	13	37	26	5	HCSASSSSL	13	2859	32	2	N	0.099	0.086	0.51	0	0	6.5	membrane
TGME49_224090	enoyl-CoA hydratase/isomerase family protein	0.009	26	24	1	0	1	2	0	0	NA	1	919	4	0	N	0.162	0.024	9.63	0	0	0	not_screted_or_membrane
TGME49_267360	histone deacetylase SIR2-like	0.002	78	67	3	0	3	9	0	0	NA	2	2292	24	0	N	0.113	0.013	0.21	0	0	0	not_screted_or_membrane
TGME49_226080	polyA polymerase	0.002	30	67	4	0	4	18	4	2	SSSLSSSSL	4	1316	31	0	N	0.12	0.08	0.59	0	0	0	not_screted_or_membrane
TGME49_273130	SAG-related sequence SRS30A	0.012	84	40	31	0	31	64	47	4	KAVCPSTTT	24	396	62	1	N	0.181	0.032	3.67	0	0	0	not_screted_or_membrane
TGME49_292250	SAG-related sequence SRS36A	0.01	108	71	18	8	26	53	59	7	HVRRSFWCSR	25	222	46	0	N	0.131	0.017	0	0	0	12	Secreted
TGME49_224770	SAG-related sequence SRS40D	0.349	27	59	8	6	14	40	20	5	ESSGSSSVEK	14	378	39	0	Y	0.251	0.124	9.92	7.99	0	5	membrane_and_secreted
TGME49_207140	SAG-related sequence SRS49B	0.376	8	28	0	3	3	16	0	0	NA	3	460	19	0	N	0.194	0.052	1.97	0.52	0	23	membrane
TGME49_279000	SAG-related sequence SRS59J	0.002	97	15	2	1	3	2	4	3	ELKTGPQLR	3	163	4	0	N	0.105	0.06	0.01	0	0	0	not_screted_or_membrane
TGME49_248310	SNF7 family protein	0.002	59	133	1	0	1	3	0	0	NA	1	557	4	0	N	0.107	0.06	0	0	0	0	not_screted_or_membrane
TGME49_258100	TPR repeat region protein	0.001	66	11	2	0	2	12	20	2	RSPSSRSLF	2	412	23	0	N	0.271	0.317	0	0	0	0	not_screted_or_membrane
TGME49_215640	zinc finger	0.002	14	143	45	15	60	245	171	5	SPSSGYAPS	57	2154	96	0	N	0.104	0.023	0.17	0	0	0	not_screted_or_membrane

## Sheet: Exposed_and_no_PS
ID	Protein Name	Vacceed_score	Ortholog No	No_of_sites	P>95%	P>99%	P>95+99%	Peptides with PSS	Consecutive PSS	Max. consec	Max. peptide	Used PSS	HB peptides	Alleles with PSS	phobius_TM	phobius_SP	signalp_D	targetp_SP	tmhmm_ExpAA	tmhmm_First60	tmhmm_PredHel	wolf_score	wolf_annotation
TGME49_262470	C protein immunoglobulin-A-binding beta antigen	0.884	69	25	0	0	0	0	0	0	NA	0	489	0	0	Y	0.744	0.92	7.28	7.28	0	32	Secreted
TGME49_239250	diacylglycerol kinase	0.989	50	0	0	0	0	0	0	0	NA	0	2519	0	3	N	0.458	0.263	62.24	22.36	3	19	membrane
TGME49_203300	hypothetical protein	1	4	16	0	0	0	0	0	0	NA	0	2223	0	3	N	0.109	0.072	95.37	0	2	29	membrane
TGME49_230350	hypothetical protein	1	36	0	0	0	0	0	0	0	NA	0	2233	0	8	N	0.142	0.191	136.9	0	4	31	membrane
TGME49_245630	hypothetical protein	0.926	58	0	0	0	0	0	0	0	NA	0	263	0	2	N	0.276	0.984	41.63	41.63	2	10	membrane
TGME49_267980	hypothetical protein	0.882	79	29	0	0	0	0	0	0	NA	0	469	0	1	N	0.134	0.341	23.42	23.41	1	2.5	membrane_and_secreted
TGME49_297270	hypothetical protein	0.845	110	4	0	0	0	0	0	0	NA	0	856	0	0	Y	0.847	0.932	3.4	3.35	0	23	Secreted
TGME49_212130	phospholipase	1	11	0	0	0	0	0	0	0	NA	0	1971	0	4	N	0.108	0.063	61.45	0	2	28	membrane
TGME49_272290	pyruvate dehydrogenase complex subunit PD-HE1Beta	0.814	81	2	0	0	0	0	0	0	NA	0	912	0	0	Y	0.77	0.948	5.3	4.63	0	17.5	Secreted
TGME49_320250	SAG-related sequence SRS15A	0.873	138	27	0	0	0	0	0	0	NA	0	326	0	0	Y	0.477	0.247	20.71	17.58	1	5.5	membrane_and_secreted
TGME49_320170	SAG-related sequence SRS16E	0.887	132	2	0	0	0	0	0	0	NA	0	376	0	0	Y	0.601	0.265	19.78	8.26	0	27	Secreted
TGME49_301150	SAG-related sequence SRS19B	0.652	116	21	0	0	0	0	0	0	NA	0	414	0	0	Y	0.346	0.193	16.14	14.08	0	11.5	Secreted
TGME49_301170	SAG-related sequence SRS19D	0.837	117	52	0	0	0	0	0	0	NA	0	435	0	0	Y	0.388	0.143	25.41	9.01	1	4	membrane_and_secreted
TGME49_238500	SAG-related sequence SRS22F	0.8	46	15	0	0	0	0	0	0	NA	0	261	0	0	Y	0.812	0.874	6.33	0.01	0	27	Secreted
TGME49_224790	SAG-related sequence SRS40A	0.841	28	9	0	0	0	0	0	0	NA	0	428	0	0	Y	0.398	0.243	24.03	19.48	1	3.5	membrane_and_secreted

## Sheet: Not_exposed_and_no_PS
ID	Protein Name	Vacceed_score	Ortholog No	No_of_sites	P>95%	P>99%	P>95+99%	Peptides with PSS	Consecutive PSS	Max. consec	Max. peptide	Used PSS	HB peptides	Alleles with PSS	phobius_TM	phobius_SP	signalp_D	targetp_SP	tmhmm_ExpAA	tmhmm_First60	tmhmm_PredHel	wolf_score	wolf_annotation
TGME49_223660	50S ribosomal protein L4	0.001	25	3	0	0	0	0	0	0	NA	0	1336	0	0	Y	0.195	0.034	0	0	0	0	not_screted_or_membrane
TGME49_217050	ADA2-A transcriptional co-activator SAGA component	0.002	18	149	0	0	0	0	0	0	NA	0	1603	0	0	N	0.108	0.046	0.01	0	0	0	not_screted_or_membrane
TGME49_237700	ADP/ATP carrier protein	0.235	115	1	0	0	0	0	0	0	NA	0	100	0	0	N	0.111	0.069	5.54	5.54	0	9.5	membrane
TGME49_234280	AMP deaminase	0.002	37	0	0	0	0	0	0	0	NA	0	1946	0	0	N	0.101	0.059	0.15	0	0	0	not_screted_or_membrane
TGME49_202790	dihydrouridine synthase (dus) protein	0.002	2	3	0	0	0	0	0	0	NA	0	956	0	0	N	0.111	0.062	0.22	0.01	0	0	not_screted_or_membrane
TGME49_249620	histone deacetylase HDAC2	0.002	60	0	0	0	0	0	0	0	NA	0	954	0	0	N	0.101	0.019	0	0	0	0	not_screted_or_membrane
TGME49_267340	hypothetical protein	0.001	77	0	0	0	0	0	0	0	NA	0	247	0	0	N	0.175	0.115	0.01	0	0	0	not_screted_or_membrane
TGME49_235710	hypothetical protein	0.002	40	7	0	0	0	0	0	0	NA	0	275	0	0	N	0.113	0.114	0.37	0.04	0	0	not_screted_or_membrane
TGME49_325000	hypothetical protein	0.002	140	5	0	0	0	0	0	0	NA	0	154	0	0	N	0.107	0.065	0	0	0	0	not_screted_or_membrane
TGME49_319670	hypothetical protein	0.002	131	4	0	0	0	0	0	0	NA	0	333	0	0	N	0.107	0.058	0	0	0	0	not_screted_or_membrane
TGME49_307000	hypothetical protein	0.002	120	39	0	0	0	0	0	0	NA	0	290	0	0	N	0.108	0.154	0	0	0	0	not_screted_or_membrane
TGME49_216030	hypothetical protein	0.003	16	9	0	0	0	0	0	0	NA	0	1653	0	0	N	0.238	0.184	0.14	0.01	0	5.5	membrane_and_secreted
TGME49_299980	hypothetical protein	0.014	114	8	0	0	0	0	0	0	NA	0	619	0	0	N	0.197	0.082	7.31	7.2	0	0	not_screted_or_membrane
TGME49_225970	mediator complex subunit MED31	0.002	29	28	0	0	0	0	0	0	NA	0	344	0	0	N	0.105	0.048	0.05	0	0	0	not_screted_or_membrane
TGME49_244480	peptidase M16 inactive domain-containing protein	0.002	56	14	0	0	0	0	0	0	NA	0	734	0	0	N	0.137	0.126	0.03	0.02	0	0	not_screted_or_membrane
TGME49_263060	Proteasome/cyclosome repeat-containing protein	0.103	72	1	0	0	0	0	0	0	NA	0	2024	0	1	N	0.164	0.156	6.81	0.46	0	5.5	membrane
TGME49_234930	SAG-related sequence SRS43	0.019	38	72	0	0	0	0	0	0	NA	0	590	0	0	Y	0.243	0.18	8.54	6.21	0	0	not_screted_or_membrane
TGME49_290270	SPRY domain-containing protein	0.002	105	2	0	0	0	0	0	0	NA	0	884	0	0	N	0.111	0.039	0	0	0	0	not_screted_or_membrane
TGME49_278070	Toxoplasma gondii family A protein	0.001	88	59	0	0	0	0	0	0	NA	0	442	0	0	N	0.177	0.107	0.13	0.11	0	0	not_screted_or_membrane
