# Supplementary material for: A Gene-Based Positive Selection Detection Approach to Identify Vaccine Candidates Using Toxoplasma gondii as a Test Case Protozoan Pathogen
Source: PubMed Central journal article supplement (PMC6109633; doi:10.3389/fgene.2018.00332), 2018-08-20
Supplement: Table_1.pdf [file Table_1.pdf]

*Supplementary Material*

**A gene-based positive selection detection approach to identify vaccine candidates using *Toxoplasma gondii* as a test case protozoan pathogen**

Stephen J. Goodswen, Paul J. Kennedy, John T. Ellis\*

**Correspondence:** John Ellis: John.Ellis@uts.edu.au

**Supplementary Table S1:** Command-line syntax for programs used in study

| <b>Program<sup>a</sup></b> | <b>Command-line syntax with parameters<sup>b</sup></b>                                                                                                                                                                                                   |
|----------------------------|----------------------------------------------------------------------------------------------------------------------------------------------------------------------------------------------------------------------------------------------------------|
| BLASTP                     | <code>blastp -query prot_Toxoplasma_ME49.fasta -subject prot_Toxoplasma_FOU.fasta -outfmt "10 evaluate qseqid qlen sseqid slen bitscore score pident nident mismatches positive" -max_target_seqs 5 -out blastp_Toxoplasma_ME49</code>                   |
| Clustal Omega              | <code>clustalo -i mrna_sequences.txt -o clustal_output --force</code>                                                                                                                                                                                    |
| PAL2NAL                    | <code>pal2nal.pl clustal_output mRNA_sequences.fasta -output paml -nogap &gt; pal2nal_output</code>                                                                                                                                                      |
| RAxML                      | <code>raxmlHPC-PTHREADS -f a -x 12345 -p 12345 -# 100 -m GTRGAMMA -s pal2nal_output -n raxml_output -w out_dir</code>                                                                                                                                    |
| CODEML                     | <code>codeml control_file.ctl &gt; output_file</code>                                                                                                                                                                                                    |
| predict_binding.py         | <code>predict_binding.py IEDB_recommended HLA-A*23:01 9 input.fasta</code>                                                                                                                                                                               |
| MKtest                     | <code>GENOME.class &lt;- set.populations(GENOME.class,list(within_pop,between_pop))<br/>GENOME.class &lt;- MKT(GENOME.class,do.fisher.test=TRUE)<br/>results &lt;- get.MKT(GENOME.class)<br/>neutrality.index &lt;- results[1,"neutrality.index"]</code> |
| Tajima's D                 | <code>GENOME.class &lt;- neutrality.stats(GENOME.class)<br/>tajima_result &lt;- GENOME.class@Tajima.D</code>                                                                                                                                             |
| F <sub>ST</sub>            | <code>GENOME.class &lt;- F_ST.stats(GENOME.class)<br/>get.F_ST (GENOME.class,mode="nucleotide")<br/>Results &lt;- get.diversity (GENOME.class)<br/>fst_nucleotide &lt;- results[1,"nucleotide.F_ST"]</code>                                              |

<sup>a</sup>MKtest = the McDonald–Kreitman test, F<sub>ST</sub> = Fixation index. MKtest, Tajima's D and F<sub>ST</sub> methods are performed using R functions from PopGenome (<https://cran.r-project.org/web/packages/PopGenome/index.html>).

<sup>b</sup>-f a = selects the algorithm to be 'rapid Bootstrap analysis and search for best scoring ML tree in one program run'; -x = rapid Bootstrap random number seed; -p = parsimony random seed; -# = number of runs; -m GTRGAMMA = generalised time reversible (GTR) GAMMA substitution model.
